# Supplementary material for: Offline Solid-Phase Extraction and Separation of Mineral Oil Saturated Hydrocarbons and Mineral Oil Aromatic Hydrocarbons in Edible Oils, and Analysis via GC with a Flame Ionization Detector
Source: MDPI journal article supplement (doi:10.3390/foods10092026), 2021-08-28
Supplement: s1 [file s1]

Journal Name: **Foods**

**Supporting Information to the paper titled: Off-line solid phase extraction and separation of mineral oil saturated hydrocarbons and mineral oil aromatic hydrocarbons in edible oils, and analysis via GC with flame ionization detector**

**José L. Hidalgo-Ruiz <sup>1</sup>, Javier Arrebola-Liébanas <sup>1</sup>, José Luis Martínez Vidal <sup>1</sup>, Antonia Garrido Frenich <sup>1</sup> and Roberto Romero González <sup>1,\*</sup>**

*<sup>1</sup> Department of Chemistry and Physics, Analytical Chemistry Area, University of Almería, Research Centre for Mediterranean Intensive Agrosystems and Agri-Food Biotechnology (CIAIMBITAL), Agrifood Campus of International Excellence ceiA3, Carretera de Sacramento s/n, E-04120 Almería, Spain*

ORCID Codes:

José L. Hidalgo-Ruiz: 0000-0002-8604-2732

Javier Arrebola-Liébanas: 0000-0003-0760-6008

José Luis Martínez Vidal: 0000-0003-0655-2597

Antonia Garrido Frenich: 0000-0002-7904-7842

Roberto Romero-González: 0000-0002-2505-2056

\* To whom correspondence should be addressed: R. Romero-González; Tel: +34950214278; Fax: +34950015008. E-mail: rromero@ual.es, University of Almería, Carretera de Sacramento s/n, E-04120 Almería, Spain.

## **Table of contents**

**Figure S1.** Scheme of the on-column simulation system of injection used.

**Figure S2.** Comparison of the peak areas between the minimum (a) and maximum (b) temperatures of the injector and FID (c) tested.

**Table S1.** Calibration curves and  $R^2$  obtained, by ranges, of MOH.

**Table S2.** Concentration by ranges of MOH detected in the samples of edible oils analyzed.

**Figure S1.** Scheme of the on-column simulation system of injection used.

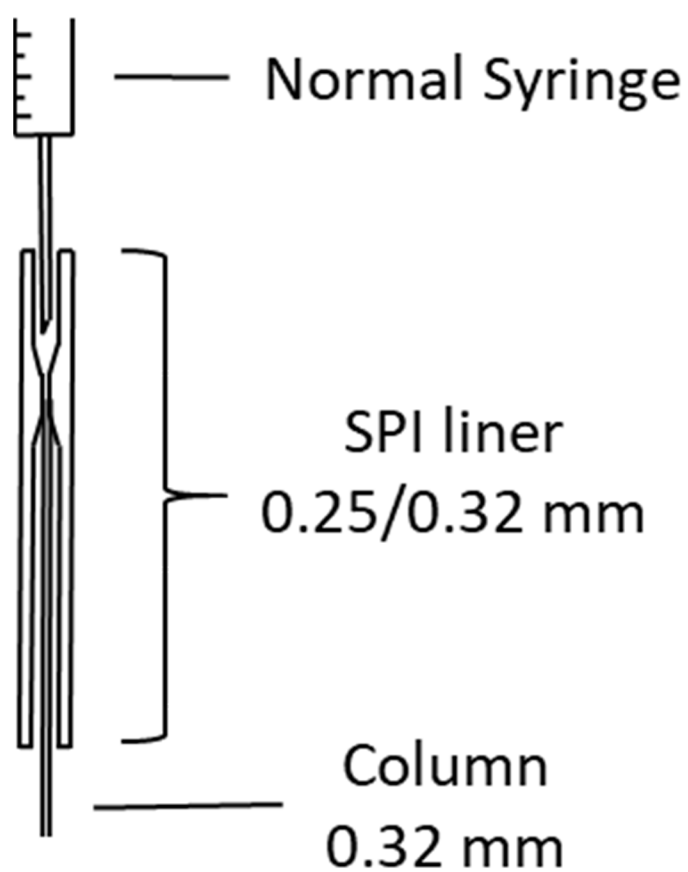

**Figure S2.** Comparison of the peak areas between the minimum (a) and maximum (b) temperatures of the injector and FID (c) tested.

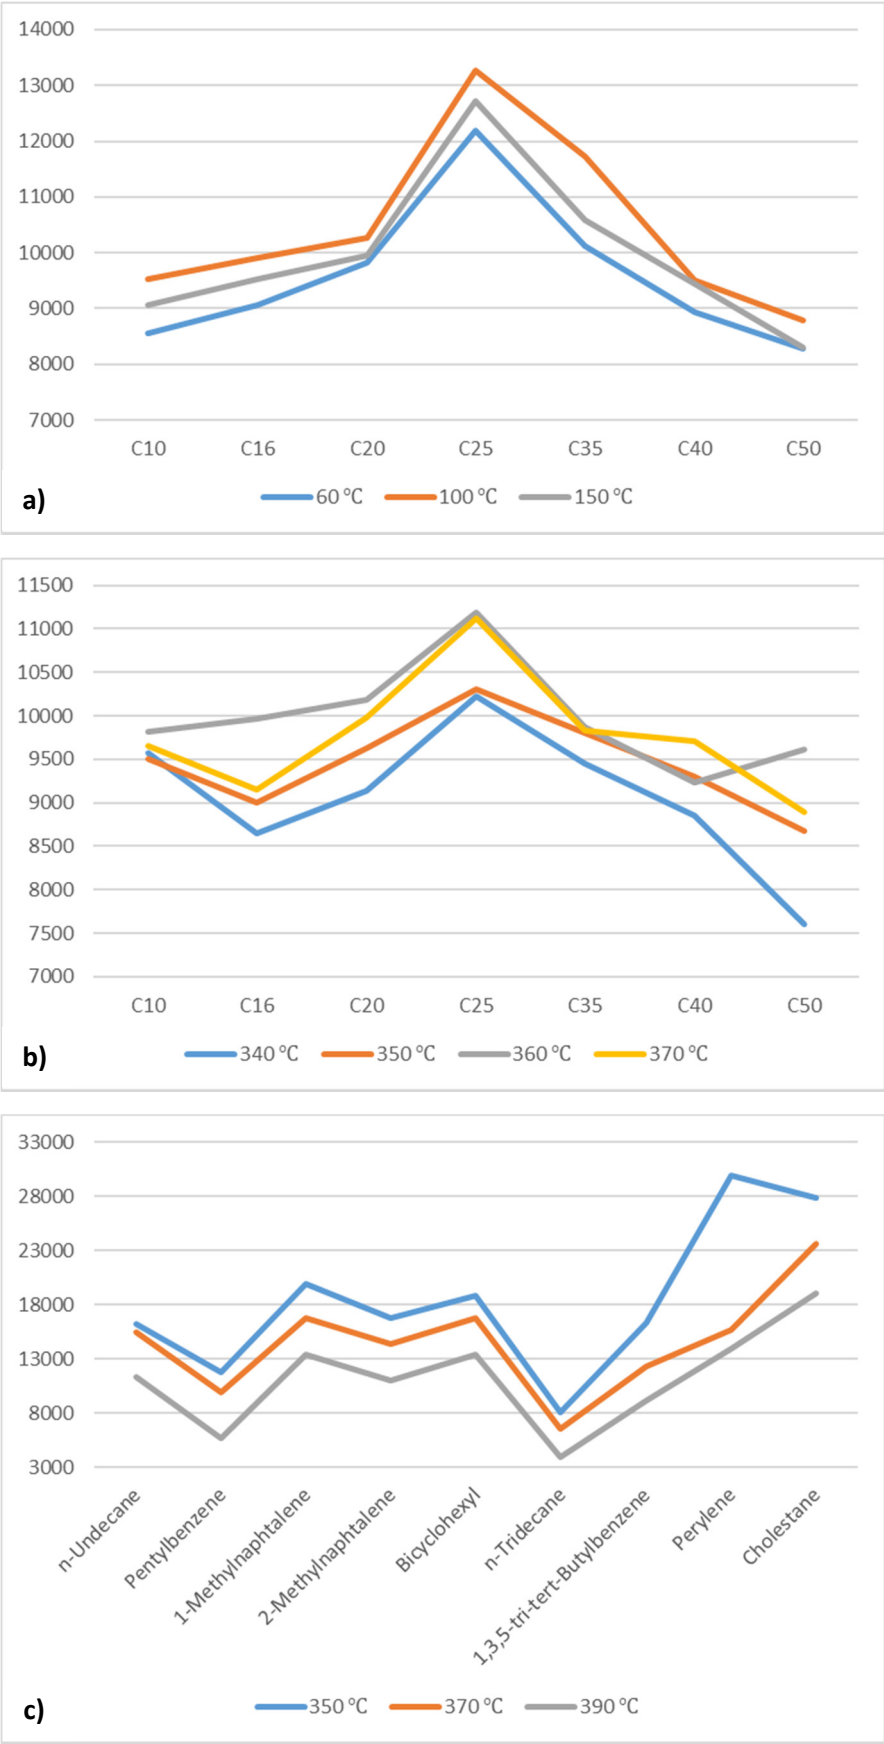

**Table S1.** Calibration curves and R<sup>2</sup> obtained, by ranges, of MOH.

|      | Hydrocarbon<br>ranges | Upper Range (mg/kg) | Calibration curves     | R <sup>2</sup> |
|------|-----------------------|---------------------|------------------------|----------------|
| MOSH | C10-C16               | 1.7                 | $y = 1237.7x + 216.49$ | 0.9918         |
|      | C16-C20               | 2.2                 | $y = 1266.3x + 220.97$ | 0.9927         |
|      | C20-C25               | 3.2                 | $y = 1227.1x + 318.73$ | 0.9960         |
|      | C25-C35               | 17.9                | $y = 1426.9x + 261.92$ | 0.9982         |
|      | C35-C40               | 11.9                | $y = 1303.4x + 505.37$ | 0.9954         |
|      | C40-C50               | 2.8                 | $y = 1281.1x + 193.66$ | 0.9943         |
| MOAH | C10-C16               | 0.8                 | $y = 1822.2x + 171.69$ | 0.9909         |
|      | C16-C25               | 1.0                 | $y = 2010.6x + 240.35$ | 0.9920         |
|      | C25-C35               | 1.8                 | $y = 2179.5x + 374.01$ | 0.9933         |
|      | C35-C50               | 0.6                 | $y = 1432.4x + 200.60$ | 0.9935         |

**Table S2.** Concentration, by ranges, of MOH detected in the samples of analyzed edible oils.

[illegible]
